# Supplementary material for: Prognostic significance of crown-like structures to trastuzumab response in patients with primary invasive HER2 + breast carcinoma
Source: PubMed Central journal article supplement (PMC9130517; doi:10.1038/s41598-022-11696-6), 2022-05-24
Supplement: 41598_2022_11696_MOESM1_ESM.pdf [file 41598_2022_11696_MOESM1_ESM.pdf]

# Prognostic significance of crown-like structures to trastuzumab response in patients with primary invasive HER2+ breast carcinoma

Charles N Birts<sup>1,2,3,†,\*</sup>, Constantinos Savva<sup>1,4,†</sup>, Stéphanie A Laversin<sup>1</sup>, Alicia Lefas<sup>1,4</sup>, Jamie Krishnan<sup>1,4</sup>, Aron Schapira<sup>1,4</sup>, Margaret Ashton-Key<sup>1,4,5</sup>, Max Crispin<sup>2,3</sup>, Peter WM Johnson<sup>4,6</sup>, Jeremy P Blaydes<sup>3,4</sup>, Ellen Copson<sup>4,6,7</sup>, Ramsey I Cutress<sup>4,6,7,\*</sup>, Stephen A Beers<sup>1,4,\*</sup>

<sup>1</sup>Antibody and Vaccine Group, Centre for Cancer Immunology, School of Cancer Sciences, Faculty of Medicine, University of Southampton, Southampton, SO16 6YD, UK. <sup>2</sup>School of Biological Sciences, Faculty of Environmental and Life Sciences, University of Southampton, Southampton, SO17 1BJ, UK.

<sup>3</sup>Institute for Life Sciences, University of Southampton, Southampton, SO17 1BJ, UK. <sup>4</sup>CRUK Southampton Centre, School of Cancer Sciences, Faculty of Medicine, University of Southampton, Southampton, SO16 6YD, UK. <sup>5</sup>Cellular Pathology, University Hospitals Southampton NHS Foundation Trust, Southampton, SO16 6YD, UK. <sup>6</sup>Southampton Experimental Cancer Medicine Centre, School of Cancer Sciences, Faculty of Medicine, University of Southampton, Southampton, SO16 6YD, UK. <sup>7</sup>NIHR Southampton Biomedical Research Centre, University of Southampton and University Hospital Southampton NHS Foundation Trust, Southampton, SO16 6YD, UK. †Equal contribution,

\*Corresponding authors.

## Supplementary figures and tables

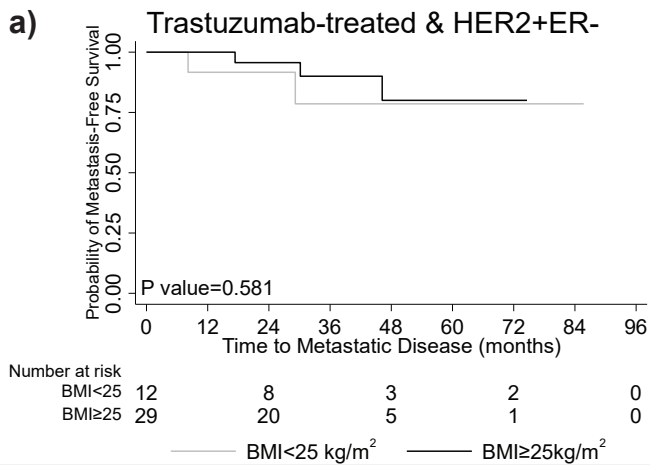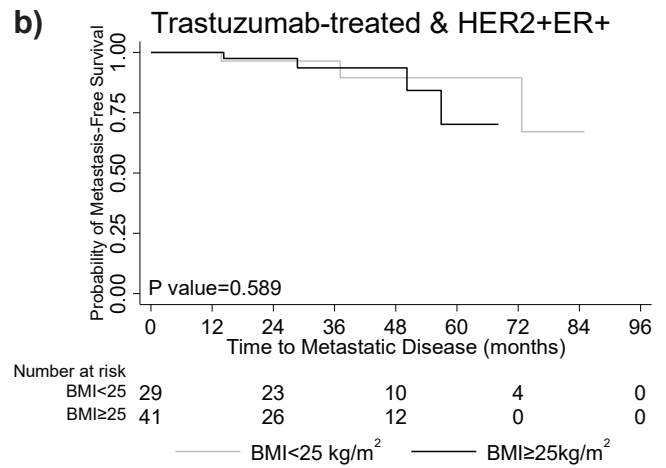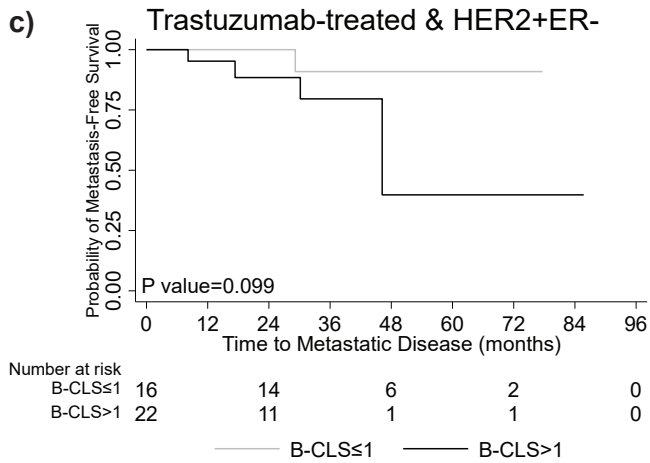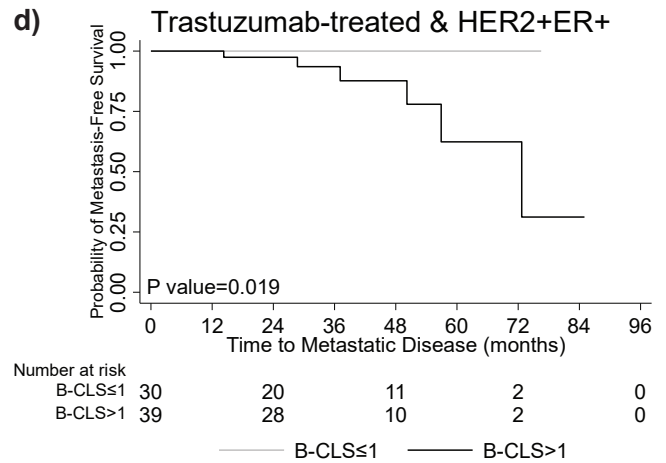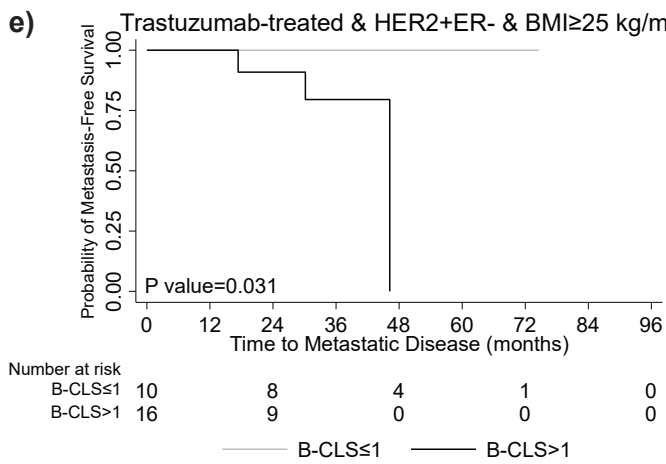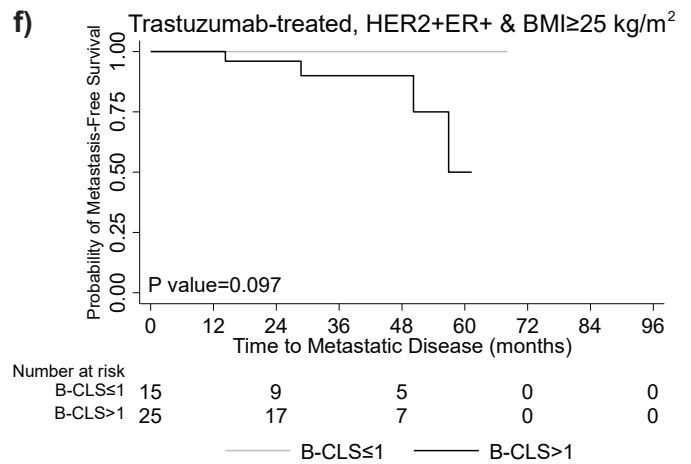

**Supplementary Figure 1. Kaplan-Meier curves showing time to metastatic disease in trastuzumab-treated patients stratified by HER2 and ER profile. Comparison of patients with a-b) BMI<25 kg/m<sup>2</sup> versus BMI≥25 kg/m<sup>2</sup> c-d) B-CLS≤1 versus B-CLS>1 and e-f) B-CLS≤1 versus B-CLS>1 in patients with BMI ≥ 25 kg/m<sup>2</sup>.**

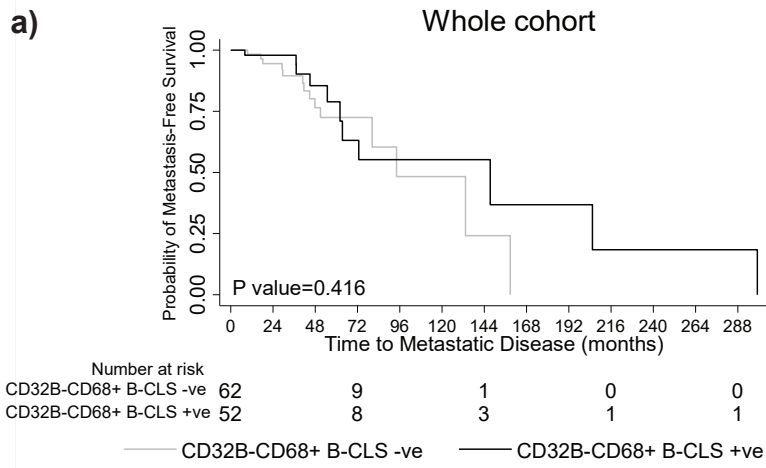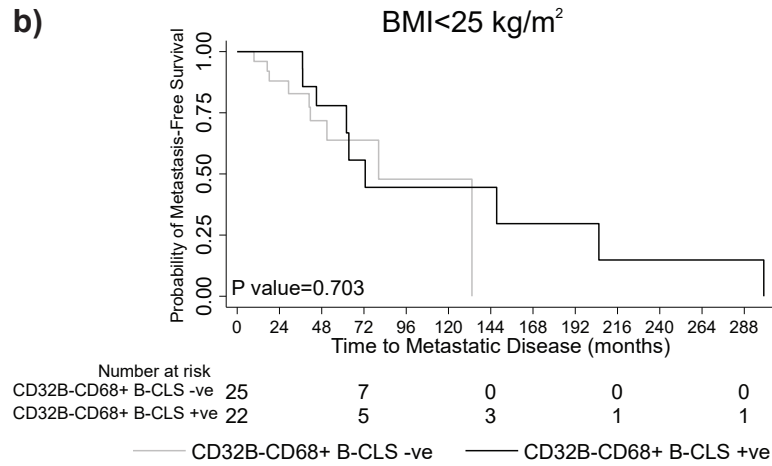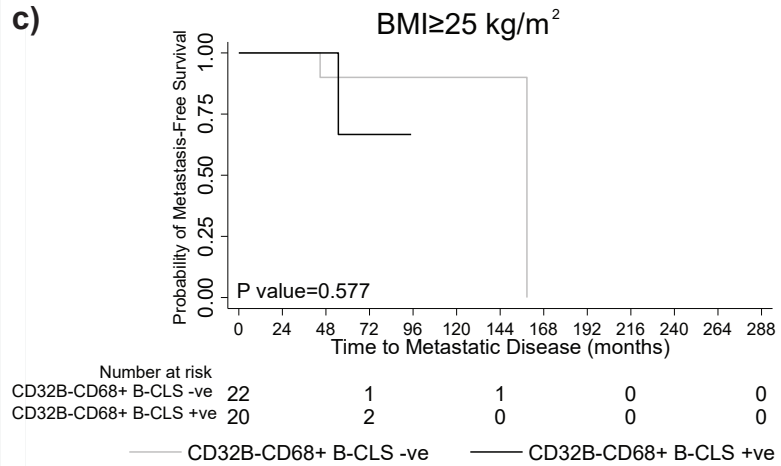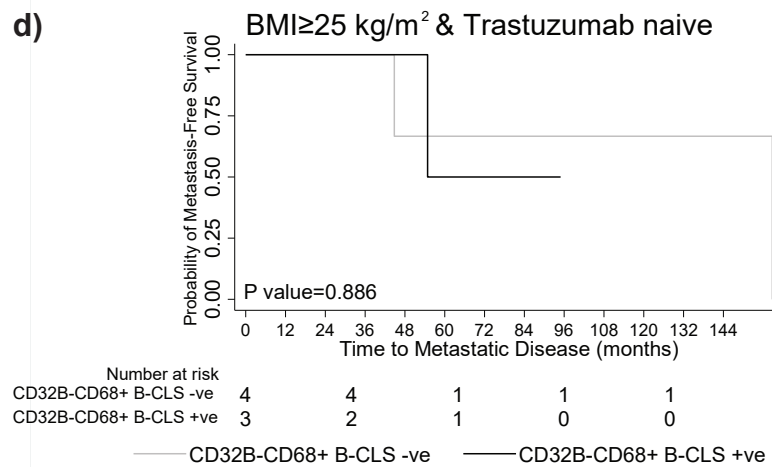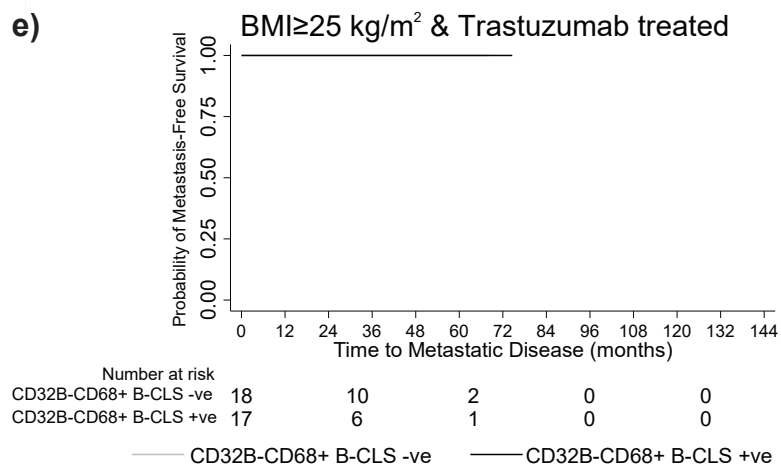

**Supplementary Figure 2. Kaplan Meier curves showing time to metastatic disease in patients with CD32B- B-CLS. a) All patients in cohort. b-c) Patients stratified by BMI. d-e) Patients with BMI ≥ 25 kg/m<sup>2</sup> stratified by trastuzumab treatment status.**

| <b>Supplementary table 1.</b> Baseline characteristics of the whole cohort of patients with primary HER2+ breast cancer (n=188). |                      |              |
|----------------------------------------------------------------------------------------------------------------------------------|----------------------|--------------|
| <b>Variable</b>                                                                                                                  | <b>N<sup>a</sup></b> | <b>N (%)</b> |
| <b>CLS</b>                                                                                                                       | <b>176</b>           |              |
| D-CLS>1                                                                                                                          |                      | 30 (17.1)    |
| D-CLS≤1                                                                                                                          |                      | 146 (82.9)   |
| B-CLS>1                                                                                                                          |                      | 97 (55.1)    |
| B-CLS≤1                                                                                                                          |                      | 79 (44.9)    |
| T-CLS>1                                                                                                                          |                      | 20 (11.4)    |
| T-CLS≤1                                                                                                                          |                      | 156 (88.6)   |
| Any-CLS>1                                                                                                                        |                      | 108 (61.4)   |
| Any-CLS≤1                                                                                                                        |                      | 68 (38.6)    |
| <b>Age (years)</b>                                                                                                               | <b>186</b>           |              |
| <49                                                                                                                              |                      | 64 (34.4)    |
| 50-59                                                                                                                            |                      | 55 (29.6)    |
| 60-69                                                                                                                            |                      | 41 (22.0)    |
| 70-79                                                                                                                            |                      | 20 (10.8)    |
| 80-89                                                                                                                            |                      | 6 (3.2)      |
| <b>BMI (kg/m<sup>2</sup>)</b>                                                                                                    | <b>151</b>           |              |
| <25                                                                                                                              |                      | 65 (43.1)    |
| ≥25                                                                                                                              |                      | 86 (57.0)    |
| <b>T stage<sup>b</sup></b>                                                                                                       | <b>187</b>           |              |
| T1                                                                                                                               |                      | 82 (43.9)    |
| T2                                                                                                                               |                      | 83 (44.4)    |
| T3                                                                                                                               |                      | 21 (11.2)    |
| T4                                                                                                                               |                      | 1 (0.5)      |
| <b>Lymph node stage<sup>b</sup></b>                                                                                              | <b>186</b>           |              |
| N0                                                                                                                               |                      | 77 (41.4)    |
| N1                                                                                                                               |                      | 92 (49.5)    |
| N2                                                                                                                               |                      | 13 (7.0)     |
| N3                                                                                                                               |                      | 4 (2.2)      |
| <b>Tumour Grade<sup>c</sup></b>                                                                                                  | <b>186</b>           |              |
| Grade 1                                                                                                                          |                      | 12 (6.5)     |
| Grade 2                                                                                                                          |                      | 41 (22.0)    |
| Grade 3                                                                                                                          |                      | 133 (71.5)   |
| <b>Tumour type</b>                                                                                                               | <b>188</b>           |              |
| Ductal                                                                                                                           |                      | 169 (89.9)   |
| Lobular                                                                                                                          |                      | 3 (1.6)      |
| Mixed Ductal/Lobular                                                                                                             |                      | 8 (4.3)      |
| Mixed other                                                                                                                      |                      | 4 (2.1)      |
| Other                                                                                                                            |                      | 4 (2.1)      |
| <b>ER status</b>                                                                                                                 | <b>185</b>           |              |
| Negative                                                                                                                         |                      | 63 (34.1)    |
| Positive                                                                                                                         |                      | 122 (66.0)   |
| <b>PR status</b>                                                                                                                 | <b>70</b>            |              |
| Negative                                                                                                                         |                      | 49 (70.0)    |
| Positive                                                                                                                         |                      | 21 (30.0)    |
| <b>Oncological treatment</b>                                                                                                     |                      |              |
| Adjuvant chemotherapy                                                                                                            | 179                  | 139 (77.7)   |
| Post-op Radiotherapy                                                                                                             | 181                  | 133 (73.5)   |
| <b>Adjuvant Trastuzumab</b>                                                                                                      | <b>186</b>           |              |
| Yes                                                                                                                              |                      | 117 (62.9)   |
| No                                                                                                                               |                      | 69 (37.1)    |
| <b>Haematological counts (10<sup>9</sup>/L)<sup>d</sup></b>                                                                      | <b>165</b>           |              |
| White cells (≥ 9)                                                                                                                |                      | 30(18.2)     |
| Neutrophils (≥5.4)                                                                                                               |                      | 49 (29.7)    |
| Platelets (≥290)                                                                                                                 |                      | 49 (29.7)    |

**Abbreviations:** D-CLS, Distant adipose tissue CLS; B-CLS, CLS at the adipose-tumour border; T-CLS, intratumoural CLS; Any-CLS, CLS at any location; a, number of cases for which data was available; b, as per TNM Classification of Malignant Tumours (8<sup>th</sup> edition); c, as defined by Nottingham grading system; d Cut-off defined by ROC analysis.

| <b>Supplementary table 2.</b> Missing data for clinical parameters by treatment status (n=186) †.                                                                                                                                                                                                                                                                                   |                      |                                 |                                     |
|-------------------------------------------------------------------------------------------------------------------------------------------------------------------------------------------------------------------------------------------------------------------------------------------------------------------------------------------------------------------------------------|----------------------|---------------------------------|-------------------------------------|
| <b>Variable</b>                                                                                                                                                                                                                                                                                                                                                                     | <b>N<sup>a</sup></b> | <b>Trastuzumab naive (n=69)</b> | <b>Adjuvant trastuzumab (n=117)</b> |
| D-CLS                                                                                                                                                                                                                                                                                                                                                                               | 12                   | 3 (4.4)                         | 9 (7.7)                             |
| B-CLS                                                                                                                                                                                                                                                                                                                                                                               | 12                   | 3 (4.4)                         | 9 (7.7)                             |
| T-CLS                                                                                                                                                                                                                                                                                                                                                                               | 12                   | 3 (4.4)                         | 9 (7.7)                             |
| Any-CLS                                                                                                                                                                                                                                                                                                                                                                             | 12                   | 3 (4.4)                         | 9 (7.7)                             |
| Age (years)                                                                                                                                                                                                                                                                                                                                                                         | 2                    | 2 (2.9)                         | 0 (0)                               |
| BMI (kg/m <sup>2</sup> )                                                                                                                                                                                                                                                                                                                                                            | 37                   | 32 (46.4)                       | 5 (4.3)                             |
| T stage <sup>b</sup>                                                                                                                                                                                                                                                                                                                                                                | 1                    | 1 (1.5)                         | 0 (0)                               |
| Lymph node stage <sup>b</sup>                                                                                                                                                                                                                                                                                                                                                       | 2                    | 1 (1.5)                         | 1 (0.9)                             |
| Tumour Grade <sup>c</sup>                                                                                                                                                                                                                                                                                                                                                           | 2                    | 2 (2.9)                         | 0 (0)                               |
| Tumour type                                                                                                                                                                                                                                                                                                                                                                         | 4                    | 4 (5.8)                         | 0 (0)                               |
| ER status                                                                                                                                                                                                                                                                                                                                                                           | 3                    | 3 (4.4)                         | 0 (0)                               |
| PR status                                                                                                                                                                                                                                                                                                                                                                           | 118                  | 44 (63.8)                       | 73 (62.4)                           |
| Adjuvant chemotherapy                                                                                                                                                                                                                                                                                                                                                               | 9                    | 8 (11.6)                        | 1 (0.9)                             |
| Post-op Radiotherapy                                                                                                                                                                                                                                                                                                                                                                | 7                    | 4 (5.8)                         | 3 (2.6)                             |
| <b>Haematological counts (10<sup>9</sup>/L)<sup>d</sup></b>                                                                                                                                                                                                                                                                                                                         |                      |                                 |                                     |
| White cells                                                                                                                                                                                                                                                                                                                                                                         | 53                   | 28 (40.6)                       | 25 (21.4)                           |
| Neutrophils                                                                                                                                                                                                                                                                                                                                                                         | 23                   | 19 (27.5)                       | 4 (3.4)                             |
| Platelets                                                                                                                                                                                                                                                                                                                                                                           | 49                   | 14 (20.3)                       | 35 (29.9)                           |
| <b>Abbreviations:</b> †Trastuzumab treatment status was available for 186 patients; D-CLS, Distant adipose tissue CLS; B-CLS, CLS at the adipose-tumour border; T-CLS, intratumoural CLS; Any-CLS, CLS at any location; a, number of cases for which data was missing; b, as per TNM Classification of Malignant Tumours (8th edition); c, as defined by Nottingham grading system. |                      |                                 |                                     |

| <b>Supplementary table 3. Distant recurrences in trastuzumab-treated patients.</b> |                    |                        |          |                           |                    |                  |
|------------------------------------------------------------------------------------|--------------------|------------------------|----------|---------------------------|--------------------|------------------|
| Follow-up (years)                                                                  | Number of patients | Distant recurrence (n) | Lost (n) | Relapse Free Survival (%) | Standard Error (%) | [95% Conf. Int.] |
| CLS≤1                                                                              |                    |                        |          |                           |                    |                  |
| 0 to 1                                                                             | 47                 | 0                      | 5        | 1.0000                    | 0.0000             | . .              |
| 1 to 2                                                                             | 42                 | 0                      | 7        | 1.0000                    | 0.0000             | . .              |
| 2 to 3                                                                             | 35                 | 1                      | 10       | 0.9667                    | 0.0328             | 0.7861 0.9952    |
| 3 to 4                                                                             | 24                 | 0                      | 6        | 0.9667                    | 0.0328             | 0.7861 0.9952    |
| 4 to 5                                                                             | 18                 | 0                      | 9        | 0.9667                    | 0.0328             | 0.7861 0.9952    |
| 5 to 6                                                                             | 9                  | 0                      | 5        | 0.9667                    | 0.0328             | 0.7861 0.9952    |
| 6 to 7                                                                             | 4                  | 0                      | 4        | 0.9667                    | 0.0328             | 0.7861 0.9952    |
| CLS>1                                                                              |                    |                        |          |                           |                    |                  |
| 0 to 1                                                                             | 61                 | 1                      | 4        | 0.9831                    | 0.0168             | 0.8857 0.9976    |
| 1 to 2                                                                             | 56                 | 2                      | 15       | 0.9425                    | 0.0324             | 0.8315 0.9812    |
| 2 to 3                                                                             | 39                 | 2                      | 13       | 0.8845                    | 0.0500             | 0.7388 0.9515    |
| 3 to 4                                                                             | 24                 | 2                      | 11       | 0.7889                    | 0.0779             | 0.5849 0.9005    |
| 4 to 5                                                                             | 11                 | 2                      | 4        | 0.6136                    | 0.1250             | 0.3308 0.8060    |
| 5 to 6                                                                             | 5                  | 0                      | 2        | 0.6136                    | 0.1250             | 0.3308 0.8060    |
| 6 to 7                                                                             | 3                  | 1                      | 0        | 0.4091                    | 0.1866             | 0.0880 0.7198    |
| 7 to 8                                                                             | 2                  | 0                      | 2        | 0.4091                    | 0.1866             | 0.0880 0.7198    |

| <b>Supplementary table 4. Distant recurrences in trastuzumab-naïve patients.</b> |                    |                        |          |                           |                    |                  |
|----------------------------------------------------------------------------------|--------------------|------------------------|----------|---------------------------|--------------------|------------------|
| Follow-up (years)                                                                | Number of patients | Distant recurrence (n) | Lost (n) | Relapse Free Survival (%) | Standard Error (%) | [95% Conf. Int.] |
| CLS≤1                                                                            |                    |                        |          |                           |                    |                  |
| 0 to 1                                                                           | 31                 | 1                      | 5        | 0.9649                    | 0.0345             | 0.7760 0.9950    |
| 1 to 2                                                                           | 25                 | 2                      | 1        | 0.8861                    | 0.0621             | 0.6864 0.9619    |
| 2 to 3                                                                           | 22                 | 1                      | 2        | 0.8439                    | 0.0720             | 0.6346 0.9387    |
| 3 to 4                                                                           | 19                 | 3                      | 2        | 0.7033                    | 0.0954             | 0.4728 0.8476    |
| 4 to 5                                                                           | 14                 | 1                      | 2        | 0.6492                    | 0.1022             | 0.4137 0.8094    |
| 5 to 6                                                                           | 11                 | 1                      | 1        | 0.5874                    | 0.1096             | 0.3471 0.7652    |
| 6 to 7                                                                           | 9                  | 1                      | 1        | 0.5183                    | 0.1165             | 0.2767 0.7144    |
| 7 to 8                                                                           | 7                  | 3                      | 0        | 0.2961                    | 0.1176             | 0.0996 0.5263    |
| 8 to 9                                                                           | 4                  | 0                      | 2        | 0.2961                    | 0.1176             | 0.0996 0.5263    |
| 11 to 12                                                                         | 2                  | 1                      | 0        | 0.1481                    | 0.1201             | 0.0124 0.4356    |
| 13 to 14                                                                         | 1                  | 1                      | 0        | 0.0000                    | .                  | . .              |
| CLS>1                                                                            |                    |                        |          |                           |                    |                  |
| 0 to 1                                                                           | 34                 | 1                      | 3        | 0.9692                    | 0.0303             | 0.8010 0.9956    |
| 1 to 2                                                                           | 30                 | 1                      | 3        | 0.9352                    | 0.0444             | 0.7644 0.9834    |
| 2 to 3                                                                           | 26                 | 1                      | 4        | 0.8963                    | 0.0571             | 0.7098 0.9656    |
| 3 to 4                                                                           | 21                 | 2                      | 5        | 0.7994                    | 0.0824             | 0.5759 0.9131    |
| 4 to 5                                                                           | 14                 | 2                      | 2        | 0.6764                    | 0.1061             | 0.4239 0.8368    |
| 5 to 6                                                                           | 10                 | 1                      | 0        | 0.6087                    | 0.1150             | 0.3510 0.7903    |
| 7 to 8                                                                           | 9                  | 1                      | 2        | 0.5327                    | 0.1233             | 0.2741 0.7360    |
| 8 to 9                                                                           | 6                  | 0                      | 1        | 0.5327                    | 0.1233             | 0.2741 0.7360    |
| 10 to 11                                                                         | 5                  | 2                      | 0        | 0.3196                    | 0.1382             | 0.0909 0.5812    |
| 12 to 13                                                                         | 3                  | 1                      | 0        | 0.2131                    | 0.1267             | 0.0374 0.4831    |
| 17 to 18                                                                         | 2                  | 1                      | 0        | 0.1065                    | 0.0984             | 0.0066 0.3688    |
| 24 to 25                                                                         | 1                  | 1                      | 0        | 0.0000                    | .                  | . .              |

| <b>Supplementary table 5.</b> Baseline characteristics of 69 trastuzumab naive patients with primary HER2+ breast cancer by B-CLS status. |                      |                          |                           |                            |                            |
|-------------------------------------------------------------------------------------------------------------------------------------------|----------------------|--------------------------|---------------------------|----------------------------|----------------------------|
| <b>Variable n (%)</b>                                                                                                                     | <b>N<sup>a</sup></b> | <b>Trastuzumab naive</b> |                           |                            |                            |
| <b>B-CLS</b>                                                                                                                              | 66                   | <b>B-CLS ≤1 (n=31)</b>   | <b>B-CLS &gt;1 (n=35)</b> | <b>P value<sup>e</sup></b> | <b>P value<sup>f</sup></b> |
| <b>Age (years)</b>                                                                                                                        | 64                   |                          |                           |                            |                            |
| <49                                                                                                                                       |                      | 5 (16.7)                 | 12 (35.3)                 | 0.346                      | 0.730                      |
| 50-59                                                                                                                                     |                      | 7 (23.3)                 | 5 (14.7)                  |                            |                            |
| 60-69                                                                                                                                     |                      | 10 (33.3)                | 6 (17.7)                  |                            |                            |
| 70-79                                                                                                                                     |                      | 6 (20.0)                 | 8 (23.5)                  |                            |                            |
| 80-89                                                                                                                                     |                      | 2 (6.7)                  | 3 (8.8)                   |                            |                            |
| <b>BMI (kg/m<sup>2</sup>)</b>                                                                                                             | 35                   |                          |                           |                            |                            |
| <25                                                                                                                                       |                      | 11 (58.8)                | 10 (55.6)                 | 0.845                      | 0.856                      |
| ≥25                                                                                                                                       |                      | 7 (41.2)                 | 8 (44.4)                  |                            |                            |
| <b>T stage<sup>b</sup></b>                                                                                                                | 65                   |                          |                           |                            |                            |
| T1                                                                                                                                        |                      | 13 (41.9)                | 21 (61.7)                 | <b>0.026</b>               | 0.280                      |
| T2                                                                                                                                        |                      | 16 (51.6)                | 7 (20.6)                  |                            |                            |
| T3                                                                                                                                        |                      | 2 (6.5)                  | 6 (17.6)                  |                            |                            |
| <b>Lymph node stage<sup>b</sup></b>                                                                                                       | 65                   |                          |                           |                            |                            |
| N0                                                                                                                                        |                      | 14 (45.2)                | 14 (41.2)                 | 0.806                      | 0.856                      |
| N1                                                                                                                                        |                      | 16 (51.6)                | 18 (52.9)                 |                            |                            |
| N2                                                                                                                                        |                      | 1 (3.2)                  | 1 (2.9)                   |                            |                            |
| N3                                                                                                                                        |                      | 0 (0)                    | 1 (2.9)                   |                            |                            |
| <b>Tumour Grade<sup>c</sup></b>                                                                                                           | 64                   |                          |                           |                            |                            |
| Grade 1                                                                                                                                   |                      | 4 (13.8)                 | 5 (14.3)                  | 0.784                      | 0.856                      |
| Grade 2                                                                                                                                   |                      | 7 (24.1)                 | 6 (17.1)                  |                            |                            |
| Grade 3                                                                                                                                   |                      | 18 (62.1)                | 24 (68.6)                 |                            |                            |
| <b>Tumour type</b>                                                                                                                        | 66                   |                          |                           |                            |                            |
| Ductal                                                                                                                                    |                      | 23 (74.2)                | 32 (91.4)                 | 0.154                      | 0.539                      |
| Lobular                                                                                                                                   |                      | 3 (9.7)                  | 0 (0)                     |                            |                            |
| Mixed Ductal/Lobular                                                                                                                      |                      | 2 (6.5)                  | 2 (5.7)                   |                            |                            |
| Other                                                                                                                                     |                      | 3 (9.7)                  | 1 (2.9)                   |                            |                            |
| <b>ER status</b>                                                                                                                          | 63                   |                          |                           |                            |                            |
| Negative                                                                                                                                  |                      | 9 (31.0)                 | 9 (26.5)                  | 0.689                      | 0.856                      |
| Positive                                                                                                                                  |                      | 20 (69.0)                | 25 (73.5)                 |                            |                            |
| <b>PR status</b>                                                                                                                          | 22                   |                          |                           |                            |                            |
| Negative                                                                                                                                  |                      | 10 (71.4)                | 6 (75.0)                  | 0.856                      | 0.856                      |
| Positive                                                                                                                                  |                      | 4 (28.6)                 | 2 (25.0)                  |                            |                            |
| <b>Treatment</b>                                                                                                                          |                      |                          |                           |                            |                            |
| Adjuvant chemotherapy                                                                                                                     | 58                   | 12 (44.4)                | 11 (35.5)                 | 0.487                      | 0.852                      |
| Post-op Radiotherapy                                                                                                                      | 62                   | 22 (78.6)                | 22 (64.7)                 | 0.321                      | 0.730                      |
| <b>Haematological counts (10<sup>9</sup>/L)<sup>d</sup></b>                                                                               | 49                   |                          |                           |                            |                            |
| White cells (≥ 9)                                                                                                                         |                      | 7 (30.4)                 | 2 (7.7)                   | <b>0.040</b>               | 0.280                      |
| Neutrophils (≥5.4)                                                                                                                        |                      | 11 (47.8)                | 7 (26.9)                  | 0.130                      | 0.539                      |
| Platelets (≥290)                                                                                                                          |                      | 8 (34.8)                 | 6 (23.1)                  | 0.365                      | 0.730                      |

**Abbreviations:** B-CLS, CLS at the adipose-tumour border; a, number of cases for which data was available; b, as per TNM Classification of Malignant Tumours (8<sup>th</sup> edition); c, as defined by Nottingham grading system; d Cut-off defined by ROC analysis; e, unadjusted p-value, Pearson's chi-squared or Fisher's exact test for categorical and t-test for continuous variables. f, Benjamini-Hochberg multiple comparison test.

**Supplementary table 6.** Baseline characteristics of 117 trastuzumab-treated patients with primary HER2+ breast cancer by B-CLS status.

| Variable n (%)                                              | N <sup>a</sup> | Trastuzumab-treated |                 |                      |                      |
|-------------------------------------------------------------|----------------|---------------------|-----------------|----------------------|----------------------|
| B-CLS                                                       | 108            | B-CLS ≤1 (n=47)     | B-CLS >1 (n=61) | P value <sup>e</sup> | P value <sup>f</sup> |
| <b>Age (years)</b>                                          | 108            |                     |                 |                      |                      |
| <49                                                         |                | 19 (40.4)           | 20 (32.8)       | 0.734                | 0.850                |
| 50-59                                                       |                | 16 (34.0)           | 24 (39.3)       |                      |                      |
| 60-69                                                       |                | 11 (23.4)           | 13 (21.3)       |                      |                      |
| 70-79                                                       |                | 1 (2.1)             | 3 (4.9)         |                      |                      |
| 80-89                                                       |                | 0 (0)               | 1 (1.6)         |                      |                      |
| <b>BMI (kg/m<sup>2</sup>)</b>                               | 103            |                     |                 |                      |                      |
| <25                                                         |                | 18 (41.9)           | 19 (31.7)       | 0.288                | 0.458                |
| ≥25                                                         |                | 25 (58.1)           | 41 (68.3)       |                      |                      |
| <b>T stage <sup>b</sup></b>                                 | 108            |                     |                 |                      |                      |
| T1                                                          |                | 20 (42.6)           | 22 (36.1)       | 0.251                | 0.458                |
| T2                                                          |                | 25 (53.2)           | 29 (47.5)       |                      |                      |
| T3                                                          |                | 2 (4.3)             | 9 (14.8)        |                      |                      |
| T4                                                          |                | 0 (0)               | 1 (1.6)         |                      |                      |
| <b>Lymph node stage <sup>b</sup></b>                        | 107            |                     |                 |                      |                      |
| N0                                                          |                | 17 (37.0)           | 25 (41.0)       | 0.005                | 0.075                |
| N1                                                          |                | 26 (56.5)           | 26 (42.6)       |                      |                      |
| N2                                                          |                | 0 (0)               | 10 (16.4)       |                      |                      |
| N3                                                          |                | 3 (6.5)             | 0 (0)           |                      |                      |
| <b>Tumour Grade <sup>c</sup></b>                            | 108            |                     |                 |                      |                      |
| Grade 1                                                     |                | 2 (4.3)             | 1 (1.6)         | 0.325                | 0.458                |
| Grade 2                                                     |                | 8 (17.0)            | 17 (27.9)       |                      |                      |
| Grade 3                                                     |                | 37 (78.7)           | 43 (70.5)       |                      |                      |
| <b>Tumour type</b>                                          | 108            |                     |                 |                      |                      |
| Ductal                                                      |                | 43 (91.5)           | 57 (93.4)       | 0.336                | 0.458                |
| Lobular                                                     |                | 0 (0)               | 0 (0)           |                      |                      |
| Mixed Ductal/Lobular                                        |                | 1 (2.1)             | 3 (4.9)         |                      |                      |
| Other                                                       |                | 3 (6.4)             | 1 (1.6)         |                      |                      |
| <b>ER status</b>                                            | 108            |                     |                 |                      |                      |
| Negative                                                    |                | 16 (34.0)           | 22 (36.1)       | 0.827                | 0.886                |
| Positive                                                    |                | 31 (66.0)           | 39 (63.9)       |                      |                      |
| <b>PR status</b>                                            | 41             |                     |                 |                      |                      |
| Negative                                                    |                | 10 (58.8)           | 18 (75.0)       | 0.273                | 0.458                |
| Positive                                                    |                | 7 (41.2)            | 6 (25.0)        |                      |                      |
| <b>Treatment</b>                                            |                |                     |                 |                      |                      |
| Adjuvant chemotherapy                                       | 107            | 46 (100.0)          | 59 (96.7)       | 0.215                | 0.215                |
| Post-op Radiotherapy                                        | 106            | 36 (78.3)           | 43 (71.7)       | 0.587                | 0.734                |
| Length of Trastuzumab, mean (SD) (months)                   | 106            | 10.80 (2.4)         | 10.24 (2.8)     | 0.286                | 0.458                |
| <b>Haematological counts (10<sup>9</sup>/L)<sup>d</sup></b> | 105            |                     |                 |                      |                      |
| White cells (≥ 9)                                           |                | 5 (11.4)            | 16 (26.2)       | 0.060                | 0.420                |
| Neutrophils (≥5.4)                                          |                | 9 (20.5)            | 20 (32.8)       | 0.163                | 0.458                |
| Platelets (≥290)                                            |                | 9 (20.5)            | 22 (36.1)       | 0.084                | 0.420                |

**Abbreviations:** B-CLS, CLS at the adipose-tumour border; a, number of cases for which data was available; b, as per TNM Classification of Malignant Tumours (8<sup>th</sup> edition); c, as defined by Nottingham grading system; d Cut-off defined by ROC analysis; e, unadjusted p-value, Pearson's chi-squared or Fisher's exact test for categorical and t-test for continuous variables. f, Benjamini-Hochberg multiple comparison test.



**Supplementary table 7.** Univariate and multivariate analysis for time to metastatic disease of the trastuzumab-treated patients comparing multiple CD32B+ B-CLS +ve vs CD32B+ B-CLS -ve patients.

| Variable                                                | N <sup>a</sup> | Univariate HR<br>(95%CI) | P-value      | Multivariate HR<br>(95%CI) | P-value      |
|---------------------------------------------------------|----------------|--------------------------|--------------|----------------------------|--------------|
| CD32B+ B-CLS>1 +ve versus CD32B+ B-CLS -ve <sup>b</sup> | 99             | 5.83 (1.4-23.7)          | <b>0.014</b> | 4.9 (1.2-20.6)             | <b>0.029</b> |
| BMI ≥25 versus <25 kg/m <sup>2</sup>                    | 111            | 1.1 (0.3-3.5)            | 0.914        |                            |              |
| T3/4 versus T1/2 tumour stage <sup>c</sup>              | 116            | 2.8 (0.8-10.4)           | 0.123        |                            |              |
| N2/3 versus N0/1 nodal stage <sup>c</sup>               | 115            | 3.8 (0.8-18.7)           | 0.097        |                            |              |
| Tumour grade 3 versus grade 1/2 <sup>d</sup>            | 116            | 0.9 (0.2-3.2)            | 0.841        |                            |              |
| HER2+ER- versus HER2+ER+                                | 115            | 1.3 (0.4-4.2)            | 0.642        |                            |              |
| White cell count (≥9 versus <9 10 <sup>9</sup> /L)      | 112            | 3.8 (1.2-12.6)           | <b>0.028</b> | 1.9 (0.4-8.0)              | 0.404        |
| Neutrophils (≥5.4 versus <5.4 10 <sup>9</sup> /L)       | 112            | 2.8 (0.9-8.8)            | 0.072        |                            |              |
| Platelets (≥290 versus <290 10 <sup>9</sup> /L)         | 112            | 2.7 (0.9-8.3)            | 0.094        |                            |              |

**Abbreviations:** B-CLS, CLS at the adipose-tumour border; a, number of cases for which data was available; b, CD32B+ B-CLS -ve, patients with CD32B- B-CLS, CD32B+ B-CLS≤1, no B-CLS or any CLS; c, as per TNM Classification of Malignant Tumours (8<sup>th</sup> edition); d, as defined by Nottingham grading system; Bold, statistically significant.
